# Supplementary material for: Molecular Pharming of the Recombinant Protein hEGF-hEGF Concatenated with Oleosin Using Transgenic Arabidopsis
Source: MDPI journal article supplement (doi:10.3390/genes11090959), 2020-08-19
Supplement: s1 [file s1]

# Molecular pharming of the recombinant protein hEGF-hEGF concatenated with oleosin using transgenic *Arabidopsis*

Table 1. Expression analysis of fusion protein in transgenic *Arabidopsis* seeds.

|                                                              | Line 1     | Line 2     | Line 3     | Line 4     | Line 5    | Line 6     |
|--------------------------------------------------------------|------------|------------|------------|------------|-----------|------------|
| Grayscale value                                              | 37061.8674 | 10542.7119 | 98074.6190 | 10500.6663 | 10102.849 | 8963.08962 |
|                                                              | 1          | 8          | 4          | 4          | 9         | 4          |
| Quality ( The mass of EGF in 8uL oil body suspension (ng ) ) | 43.2144    | 10.4168    | 118.672    | 10.3648    | 9.8728    | 8.4632     |
| Concentration(ng/uL)                                         | 5.4018     | 1.3021     | 14.834     | 1.2956     | 1.2341    | 1.0579     |

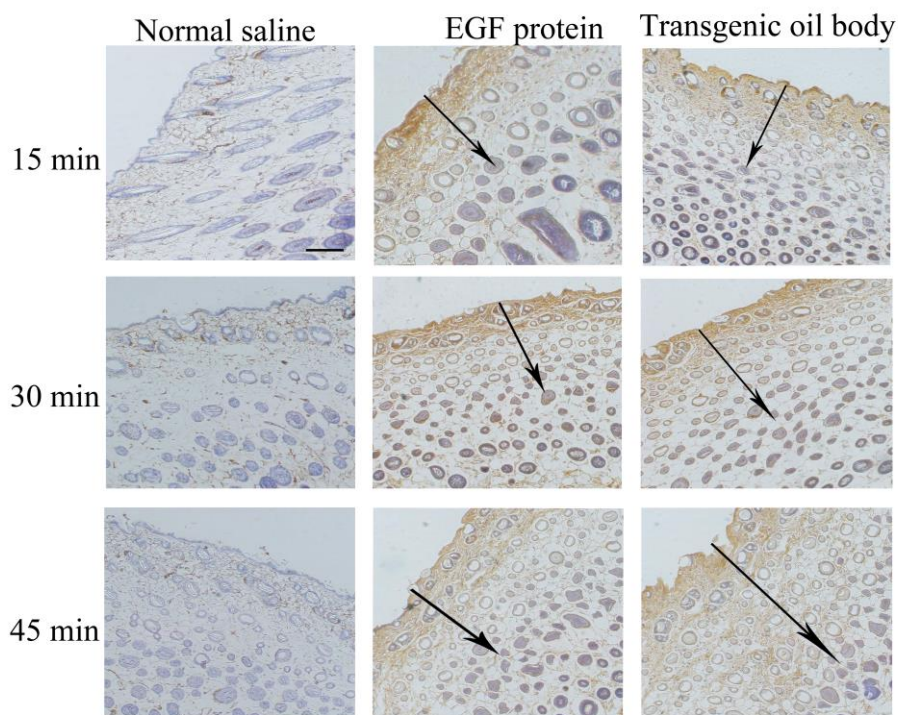

**Figure 1.** The ability of transgenic oil bodies bound hEGF to infiltrate into skin. The immunohistochemistry analysis of drug absorption at different times is shown. EGF protein is the positive group and Normal saline is the negative control group. The images were shown at 40×10 magnification (Scale bars = 50µm).
